# Supplementary material
Source: publisher figshare collection journal article supplement (https://acs.figshare.com/ndownloader/files/3904828)
Supplement: Supplementary file 1 [file 3904828]

## SUPPORTING INFORMATION

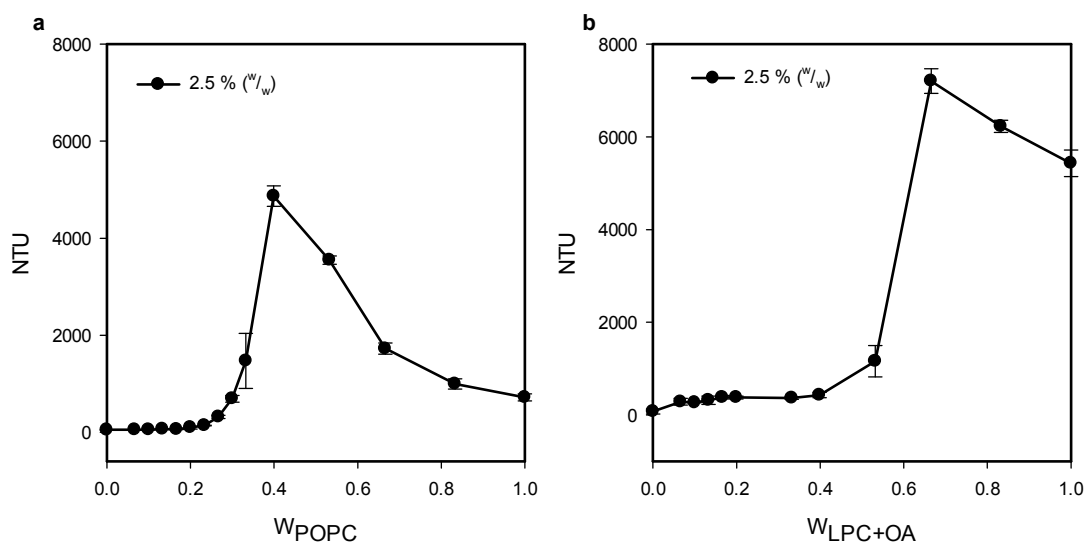

**Figure S1.** Complete solubilisation plot of POPC and digested POPC (LPC+OA) by GDX at varying total lipid concentrations 2.5 % w/w. See Figure 3 for description of X-axis. (a) Turbidity of POPC/GDX mixtures. (b) Turbidity of LPC+OA/GDX mixtures.

**Table S1.** Predicted phase boundary from regression analysis

| % w/w | Mass Fraction     |                   |
|-------|-------------------|-------------------|
|       | POPC              | LPC+OA            |
| 0.25  | 0.54 <sup>†</sup> | 0.55 <sup>†</sup> |
| 0.5   | 0.45 <sup>†</sup> | 0.49 <sup>†</sup> |
| 1.0   | 0.31 <sup>†</sup> | 0.49 <sup>†</sup> |
| 1.5   | 0.27 <sup>*</sup> | 0.53 <sup>†</sup> |
| 2.0   | 0.27 <sup>*</sup> | 0.54 <sup>†</sup> |
| 2.25  | 0.28 <sup>*</sup> | 0.49 <sup>†</sup> |
| 2.5   | 0.29 <sup>†</sup> | 0.52 <sup>†</sup> |

□These fractions represent the phase boundaries calculated from turbidity curves using regression analysis. †The average of 3 data sets was taken for each solution in turbidity measurement. \*The average of 2 data sets was taken for each solution in turbidity measurement.
